# Supplementary material
Source: PubMed Central journal article supplement (PMC3707540)
Supplement: supp_pp.113.218941_218941supplemental_material.pdf [file supp_pp.113.218941_218941supplemental_material.pdf]

Supplemental Table 1

Segregation ratios of opaque vs. vitreous kernels from T1 ears of selected  $\alpha$ -zein RNAi events

| <b>Event</b> | <b>Observed<br/>opaque/vitreous</b> | <b>Expected<br/>opaque/vitreous</b> | <b>Chi<sup>2</sup> (1 degree of freedom)</b> | <b>Two-tailed P value</b> |
|--------------|-------------------------------------|-------------------------------------|----------------------------------------------|---------------------------|
| 609-2-1      | 26/8                                | 25.5/8.5                            | 0.039                                        | 0.84                      |
| 615-1-1      | 54/18                               | 54/18                               | 0.000                                        | 1.00                      |
| 615-1-1      | 36/11                               | 35.25/11.75                         | 0.064                                        | 0.80                      |
| 653-3-1      | 70/24                               | 70.5/23.5                           | 0.014                                        | 0.91                      |

Supplementary table 2. Primers for qRT-PCR of zein expression

z1A

F: 5'-GCTCCTTGGTCTTTCTGCAA-3'

R: 5'-GGTAACTGCTGTAATAGGGCTGATG-3'

z1B

F: 5'-CCAGCCCTATCTTTGGTGCA-3'

R: 5'-TCAGTGCGGCCAATTGGTTA-3'

z1C

F: 5'-TTCCACAATGCTCACTTGCT-3'

R: 5'-GTTGTTGTAAGACGCTCGCC-3'

z1D

F: 5'-GCACAACAACACTACAACAACA-3'

R: 5'-AATGGTAGTAGCTGTTGTGC-3'

27-kD  $\gamma$ -zein

F: 5'-GTGTCCCCCACTGAAGAACTAT-3'

R: 5'-CAATTGTTCAATTCAGGTCATTGCT-3'

50-kD  $\gamma$ -zein

F: 5'-TGTGCAACAACACGAACAGA-3'

R: 5'-ATTACCAAAGGGCTGCACTG-3'

16-kD  $\gamma$ -zein

F: 5'-TGGAGAACTCGACACCATGA-3'

R: 5'-GGTGGTTGAGTGGGGTATTG-3'

15-kD  $\beta$ -zein

F: 5'-CAGCAGATGAGGATGATGGA-3'

R: 5'-TCAGTAGTAGGGCGGAATGG-3'

Tubulin

F: 5'-GTGTCCTGTCCACCCACTCTCT

R: 5'-GGAACGTTTCACATCAACGTTT

Supplemental Figure 1

Purified zeins from transgenic mature kernels showing increased 50-kD  $\gamma$ -zein

$\alpha$ -zein RNAi, zein accumulation in mature endosperm (6 events)

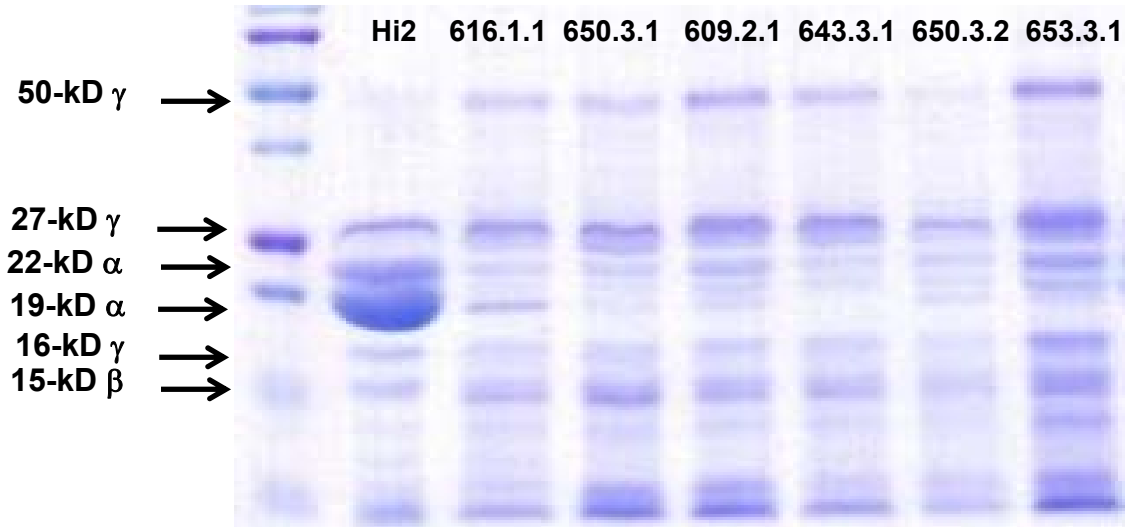

## Supplemental Figure 2 Design of synthetic zein RNAi transgenes

**Total alpha zein RNAi synthetic gene (EU116446 for Z1A, EU116472 for Z1B, EU116497 for Z1D, and EU116477 for Z1C)**

>RNAi\_Z1A<sup>B</sup>DC

Tccaacaggcaatcgcagcaggcatcttacctttatcaccccttggtcctcca  
acaaccgtcagccctattacagcagttacctttggtgcatttggtggcacia  
aacatcaaggcacaacaactacaacaacttgtgctaggaaacctgctgct  
actctcagcaacagcagtttcttccattcaaccaactggctgcattgaactc  
tgctgcttatttgCccttggtggtttcaacaatcgccagccctatcttggtg  
cagtcattgggtacaaacctcagggcacaacagctgcagcaactcgtgctac  
ctctgatcaaccaagtagctctggcaaacctttctccctactctcagcaaca  
acaatttcttccattcaaccaactgtctacactgaaccctgctgcttattg  
cagcaacaactattaccattAgcaagcatcttacggctcattagcattaacc  
tccaacaaccatattgctctattgcaacagccatccttagtgcattctgtatct  
caaagaatcgcggcacaacaactacaacaacagttgctaccaacaatcaat  
caagtagttgcagcgaaccttgctgcttacctccagcaacaacagtttcttc  
cattcaatcaactagctgggggtgaaccctgctTggtgaaccctgccgcctac  
ttgcaacagcagttgcttgcatacaaccacttgctctggcaaactgtagttg  
caaaccagccacaacaacagctgcaacagtttctgccagcgcctcagtcaact  
agccatgggtgaaccctgccgcctacctacaacagcaacaactgctttcatct  
agcccgcctcgctgtggccaatgcacctacatacctgcaacaacaattg

**Gamma zein RNAi synthetic gene AF371263 (50-kD),  
DQ400403 (16-kD) and NM\_001112534 (15-kD)**

>RNAi\_50\_gamma\_16\_gamma\_15\_beta

Ttcctaaggcagcagtgccagccctttggtaatgccttttctccaatcacggt  
tgatacaaccaagtagctgccaggtattgcagcaacaatggtgtcatgatct  
taggcagattgagccacaatacattcaccaagcaatctacaacatgggtcaa  
tcataatccaggaggagcaacaacaacaacctgtaggttatgtggatctc  
aaciaaAtgaaggtgctgatcgttgccttgctctcctggcgctcgctgag  
cgccgcctccagtacaagcggcggtgtggctgccagacaccaccgtttcat  
ctaccgcctccggttctatatgccgcctccggttctatctgccgcgcagcagc  
agccgcagccatggcaatacccactcaaccaccgcagctaagcccgtgcc  
gcagttcCgcagaacatgccggccatgggtggactctaccagtaccagctgc  
ccagctaccgcaccaaccctgtggcgtctccgctgccattccgcctacta  
ctgattcatgatatttgggaaatctcctctatccatctctctctatctatat  
atgtaataatgcagtaagacgacacacattatcatgtgtggtatgaccaata  
atatatgcatgg
